# Supplementary material for: UBL3 Interacts with Alpha-Synuclein in Cells and the Interaction Is Downregulated by the EGFR Pathway Inhibitor Osimertinib
Source: MDPI journal article supplement (doi:10.3390/biomedicines11061685), 2023-06-10
Supplement: s1 [file s1]

**A**

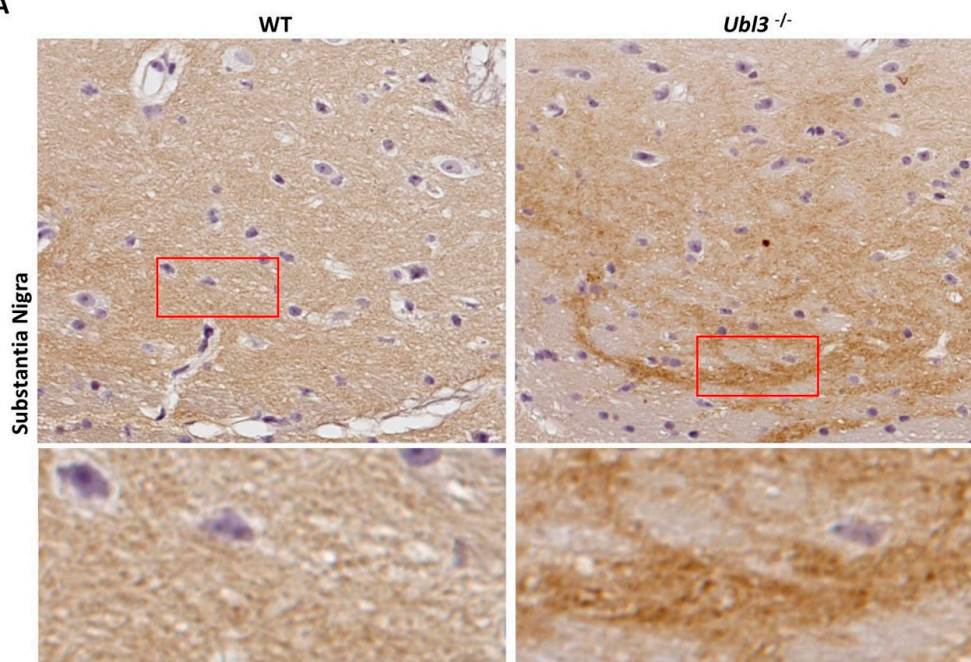

**B**

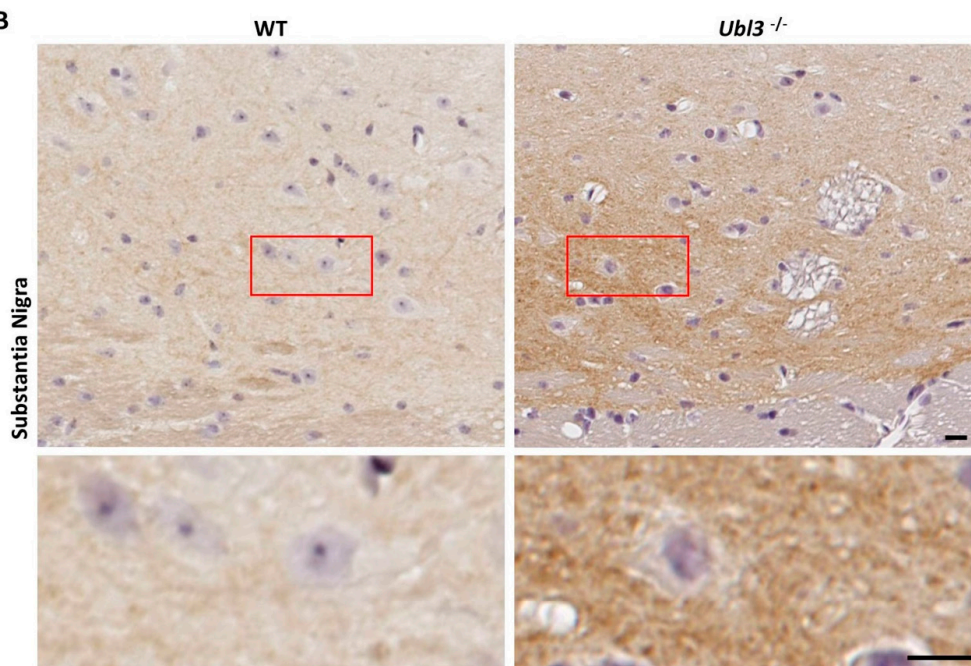

**C**

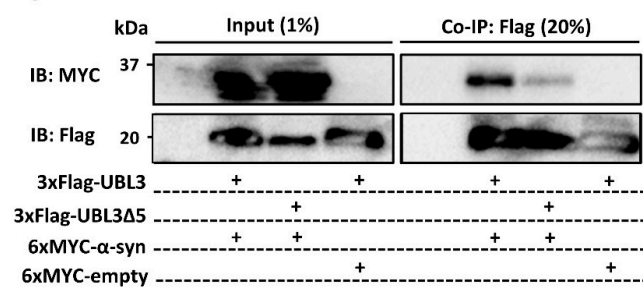

**Supplementary Figure S1.** Reproduced IHC staining and co-immunoprecipitation (Co-IP results). (A) (B) Representative images of reproduced immunocytochemistry staining of p-S-129  $\alpha$ -syn in the substantia nigra of WT and Ubl3<sup>-/-</sup> mice. Scale bars: 10  $\mu$ m. (C) Reproduced result of co-immunoprecipitated 3xFlag-UBL3 and 3xFlag-UBL3 $\Delta$ 5 interact with 6xMYC- $\alpha$ -syn. The input lanes are 1% of the sample prior to Co-IP, and the Co-IP lanes are 20% of the Co-IP products. WT: wild type. Ubl3<sup>-/-</sup>: Ubl3 knock out.

**Supplementary Table S1. Drug list**

| <b>Drug</b>                | <b>Supplier</b>                | <b>Product ID</b> |
|----------------------------|--------------------------------|-------------------|
| Apomorphine                | Wako Bio                       | 013-18323         |
| Aniracetam                 | Combi-Blocks                   | OR-2762           |
| Chlorpromazine             | TCI                            | C2481             |
| Chloroquine Diphosphate    | Wako Bio                       | 038-17971         |
| Curcumin                   | Wako Bio                       | 038-04921         |
| Caffeic acid               | Cayman Chemical Co.            | 70602             |
| Cisplatin                  | Wako Bio                       | 033-20091         |
| Docetaxel                  | LKT Labs, Inc                  | D5709-10mg        |
| Donepezil                  | Combi-Blocks                   | ST-7783           |
| Ergoloid                   | Cayman Chemical Co.            | 24095             |
| Erlotinib                  | Med Chem Express               | HY-50896          |
| Farnesol                   | Wako Bio                       | 064-03941         |
| Famotidine                 | Wako Bio                       | 066-06701         |
| Gefitinib                  | Wako Bio                       | 078-06561         |
| Gemcitabine                | Combi-Blocks                   | QA-8591           |
| Haloperidol                | Wako Bio                       | 084-04261         |
| Memantine hydrochloride    | Combi-Blocks                   | OR-1164           |
| Melatonin                  | Wako Bio                       | 139-17111         |
| Mannitol                   | Wako Bio                       | 139-00842         |
| Methylcobalamin            | Wako Bio                       | 138-14261         |
| Medetomidine Hydrochloride | Wako Bio                       | 139-17471         |
| Osimertinib                | LC Laboratories                | O-7200            |
| Pemetrexed                 | Combi-Blocks                   | QB-9701           |
| Pravastatin                | Cayman Chemical Co.            | 10010342          |
| Rivastigmine               | Combi-Blocks                   | QC-5226           |
| Simvastatin                | Fluorochem Ltd.                | M03997            |
| Sulfasalazine              | MP Biomedicals, Inc.           | 191144            |
| Safinamide                 | Cayman Chemical Co.            | S1472             |
| Scutellarin                | Cayman Chemical Co.            | 27461             |
| Trifluoperazine            | TCI                            | T2849             |
| Tetrabenazine              | Toronto Research Chemicals Inc | T284000           |
| Vitamin D2                 | LKT Labs, Inc                  | V3476             |
